# Supplementary material
Source: publisher figshare collection journal article supplement (https://acs.figshare.com/ndownloader/files/4179649)
Supplement: Supplementary file 1 [file 4179649]

## **Supporting Information**

# **Atomic Hydrogen Production from Semi-Clathrate Hydrates**

**Dong-Yeun Koh, Hyery Kang, Juwoon Park, Woongchul Shin and Huen Lee\***

Department of Chemical and Biomolecular Engineering (BK21 program) and  
graduated school of EEWS, KAIST, 373-1 Guseong-dong, Yuseong-gu, Daejeon 305-  
701, Republic of Korea .

Fax: +82-42-350-3910; Tel: +82-42-350-3917;

*E-mail:* [hlee@kaist.ac.kr](mailto:hlee@kaist.ac.kr)

## Table of Contents

|                                                                                                                                                                                                                                                                                                                                                                                                                                                                                                                                                                                      | page |
|--------------------------------------------------------------------------------------------------------------------------------------------------------------------------------------------------------------------------------------------------------------------------------------------------------------------------------------------------------------------------------------------------------------------------------------------------------------------------------------------------------------------------------------------------------------------------------------|------|
| <b>Experimental Section</b>                                                                                                                                                                                                                                                                                                                                                                                                                                                                                                                                                          | —S3  |
| <b>Fig. S1</b> Full ESR spectrum of (A) TBABh + 38 H <sub>2</sub> O (g=2.0017 and a(H)=51.6 mT for H•, g=2.0022 and a <sub>av</sub> (H)= 22.1 mT for n-butyl radicals), (B) TBAF + 38 H <sub>2</sub> O (g=2.0019 and a(H)=51.8 mT for H•, g=2.0021 and a <sub>av</sub> (H)= 22.0 mT for n-butyl radicals), (C) TBAB + 38 H <sub>2</sub> O (g=2.0022 and a(H)=51.4 mT for H•, g=2.0024 and a <sub>av</sub> (H)= 22.2 mT for n-butyl radicals) and (D) TBAOH + 38 H <sub>2</sub> O (g=2.0018 and a(H)=51.9 mT for H•, g=2.0024 and a <sub>av</sub> (H)= 22.2 mT for n-butyl radicals). | —S4  |
| <b>Fig. S2</b> Full ESR spectrum of (A) TBABh + 38 H <sub>2</sub> O + H <sub>2</sub> (g=2.0019 and a(H)=51.2 mT for H•, g=2.0022 and a <sub>av</sub> (H)= 22.4 mT for n-butyl radicals), (B) TBABh + 38 H <sub>2</sub> O + N <sub>2</sub> (g=2.0019 and a(H)=51.5 mT for H•, g=2.0021 and a <sub>av</sub> (H)= 22.5 mT for n-butyl radicals), (C) TBABh + 38 H <sub>2</sub> O (g=2.0017 and a(H)=51.6 mT for H•, g=2.0022 and a <sub>av</sub> (H)= 22.1 mT for n-butyl radicals).                                                                                                    | —S5  |
| <b>Fig. S3</b> XRD pattern of TBABh + 38 H <sub>2</sub> O + N <sub>2</sub> hydrate before γ-irradiation (red) and after γ-irradiation (blue)                                                                                                                                                                                                                                                                                                                                                                                                                                         | —S6  |
| <b>Fig. S4</b> Full ESR spectrum of (A) Me <sub>4</sub> NOH + 16 H <sub>2</sub> O + N <sub>2</sub> (g=2.0014 and a(H)=51.1 mT for H•), (B) THF + H <sub>2</sub> (g=2.0018 and a(H)=50.9 mT for H•) and (C) TBABh + 38 H <sub>2</sub> O + N <sub>2</sub> (g=2.0021 and a(H)=51.2 mT for H•)                                                                                                                                                                                                                                                                                           | —S7  |
| <b>Fig. S5</b> Phase equilibrium data of TBABh + 38 H <sub>2</sub> O + N <sub>2</sub> (black square), THF + H <sub>2</sub> (red circle) and Me <sub>4</sub> NOH + 16 H <sub>2</sub> O + N <sub>2</sub> (blue triangle)                                                                                                                                                                                                                                                                                                                                                               | —S8  |
| <b>Table. S1</b> Amount of NIGM molecules confirmed by direct release experiments of two sets of system (TBABh + N <sub>2</sub> system, TBABh + H <sub>2</sub> system)                                                                                                                                                                                                                                                                                                                                                                                                               | —S9  |
| <b>Reference in Fig. S5</b>                                                                                                                                                                                                                                                                                                                                                                                                                                                                                                                                                          |      |
| Hashimoto, S.; Murayama, S.; Sugahara, T.; Sato, H.; Ohgaki K.; <i>Chem. Eng. Sci.</i> <b>2006</b> , 61, 7884-7888                                                                                                                                                                                                                                                                                                                                                                                                                                                                   |      |

## Experimental Section

Deionized water with ultrahigh purity was supplied from Merck (Germany) and the TBABh, TBAB, TBAF, TBAOH, THF, Me<sub>4</sub>NOH and D<sub>2</sub>O were supplied by SIGMA-ALDRICH Inc. H<sub>2</sub> and N<sub>2</sub> gas with a purity of 99.995mol% was supplied by Special Gas (Korea). Solutions of proper mole-composition of TBABh, TBAB, TBAF, TBAOH, THF, Me<sub>4</sub>NOH were frozen at 210K for at least 24 hour and were then ground to a fine power (~200μm) in liquid nitrogen. For TBABh solution, NaOH (molar ratio of OH<sup>-</sup>/BH<sub>4</sub><sup>-</sup> = 0.05) was added to prevent premature hydrolysis reaction. The grounded powders were pressurized by H<sub>2</sub> or N<sub>2</sub> at 210K for at least 1 week. The formed hydrate samples were stored in liquid nitrogen and gamma-ray irradiated as 30 kGy (15 kGy per 1hr) by a <sup>60</sup>Co γ-ray source at KAERI in Jeongup, Korea.

The polycrystalline samples were measured at 77K by an X-band ESR spectrometer (JEOL FA200) at a modulation of 100 kHz using a modulation width of 0.5 mT, a microwave power of 1 mW and a sweep time of 4 minutes. 5 grams of each sample was carefully transferred to a quartz tube placed in a liquid nitrogen environment. This low-temperature condition was maintained during ESR experiments. The XRD patterns were obtained using Rigaku D/max-IIIc diffractometer with CuKα as a light source (λ=1.5406) at a generator voltage of 40 kV and a generator current of 300 mA. Low temperature stage attached to XRD kept the working temperature to 93K and step scan mode of 0.01°/3s was applied.

The equilibrium pressure and temperature were determined by checking the routine PT trajectory, which consisted of hydrate formation and dissociation stages. The cooling rate was 0.5 K/h and the heating rate was 0.2 K/h. A 4-wire type PT-100Ω (±0.05% full-scale accuracy) and a PMP4070 device from Druck Inc. were used as temperature and pressure sensing device. The direct-release experiments were conducted at 293K and were repeated three times for reliability.

Fig. S1

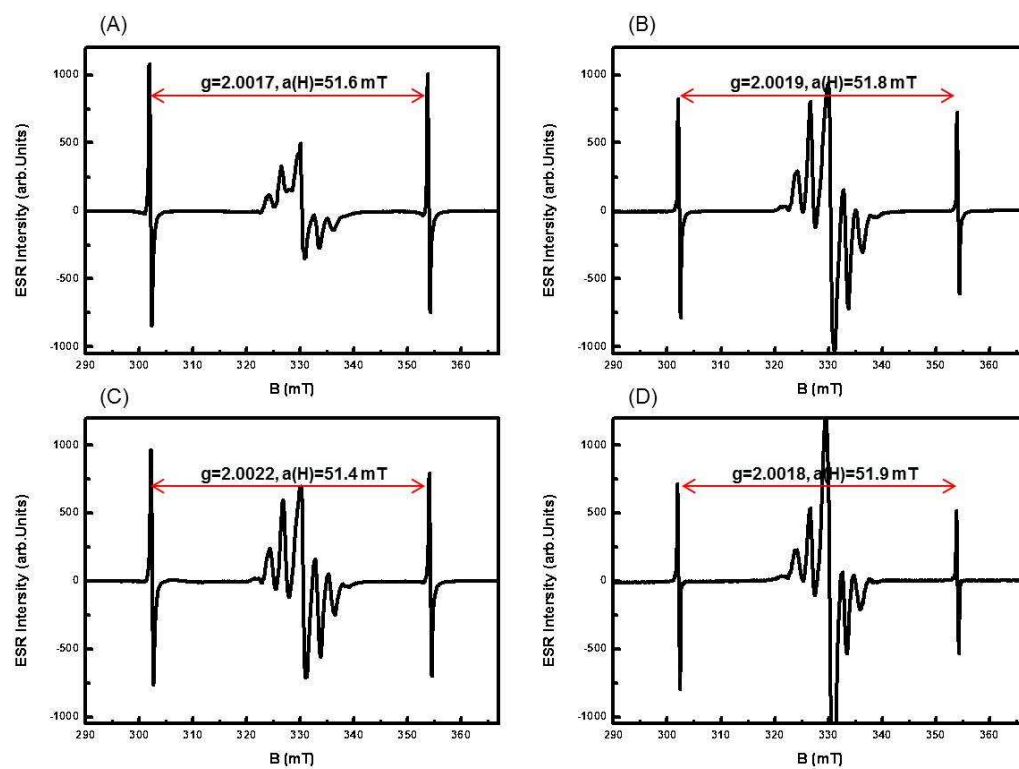

Fig. S2

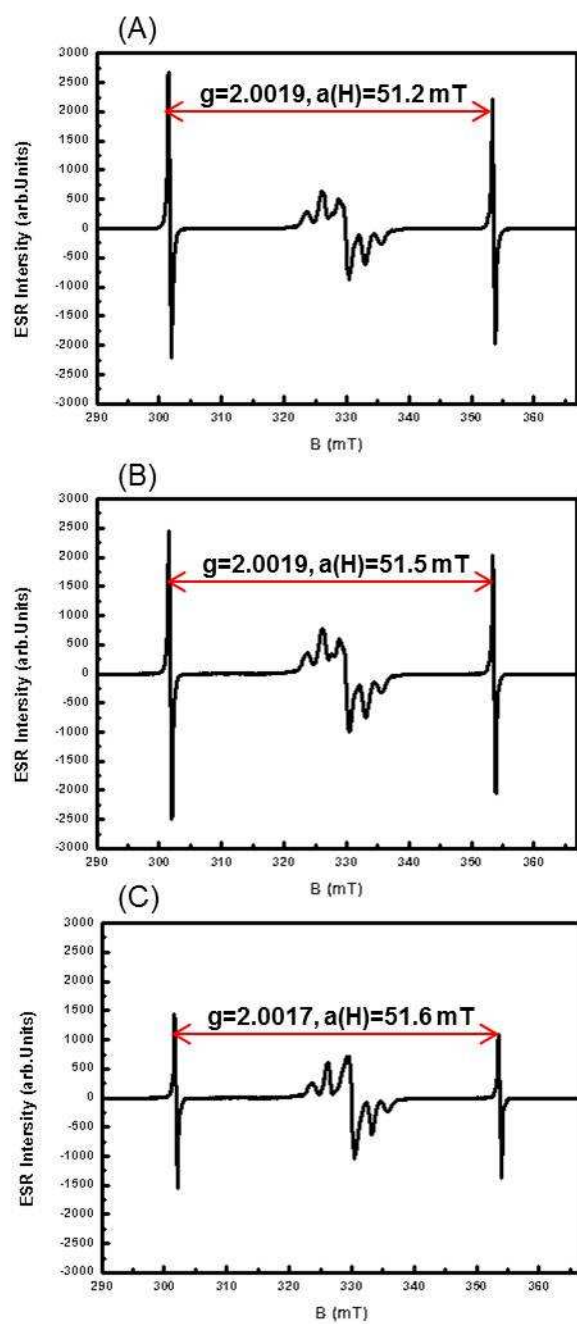

**Fig. S3**

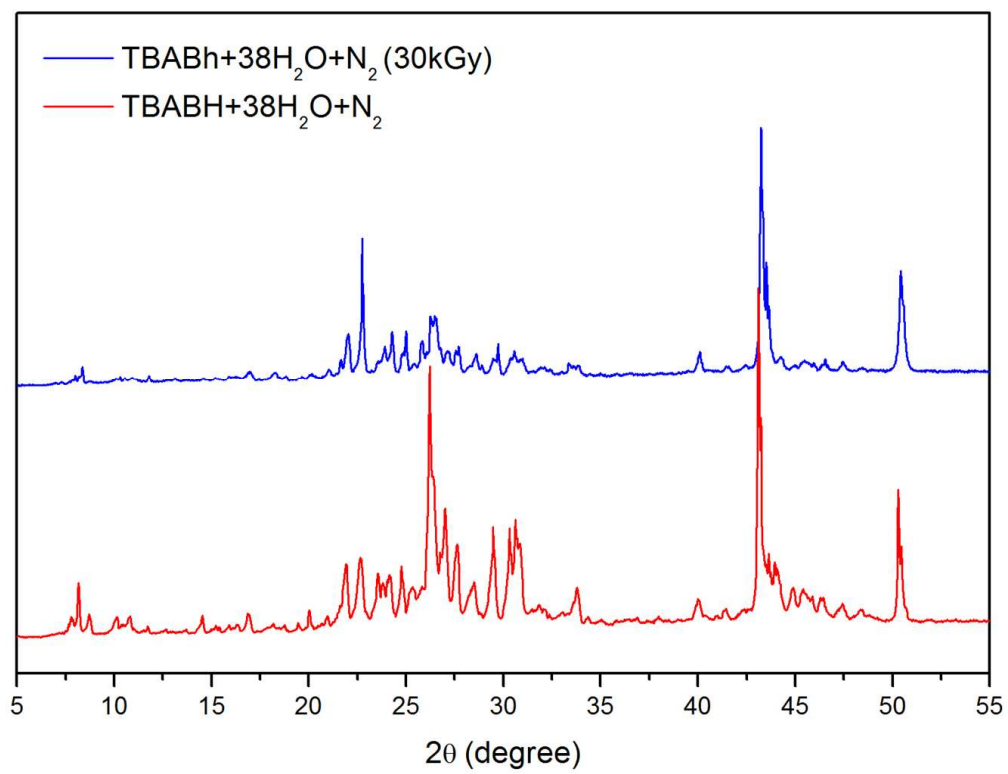

Fig. S4

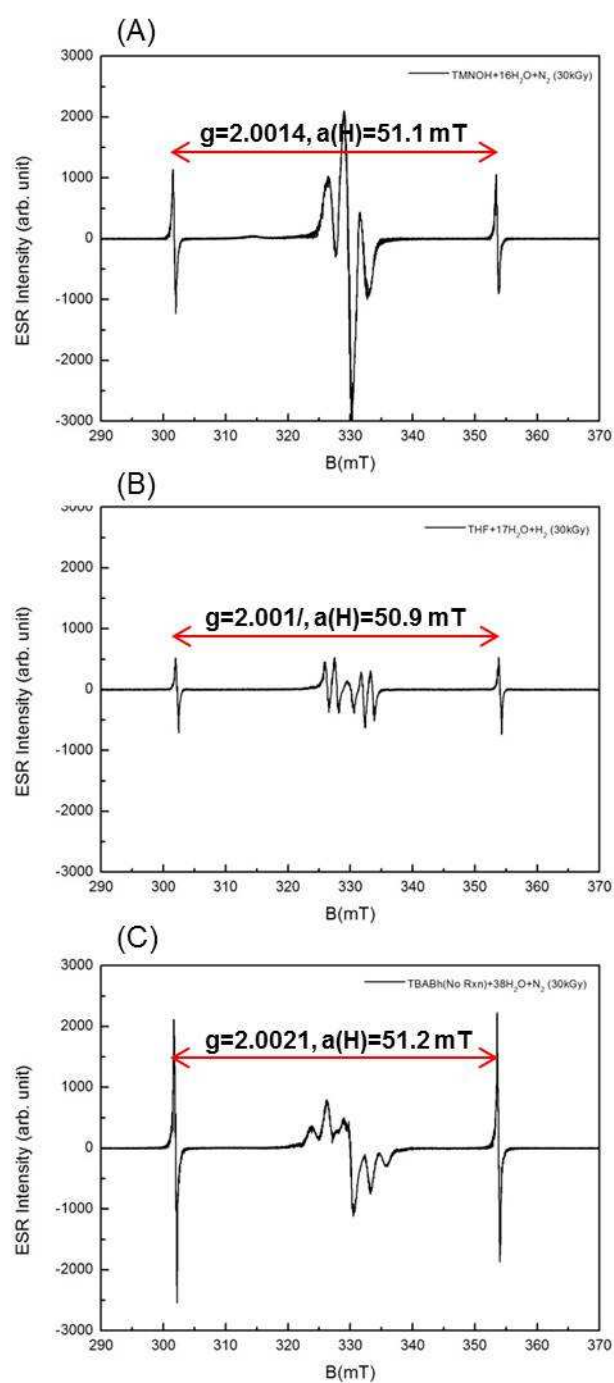

**Fig. S5 (This figure is newly inserted in the revision. Here, we don't provide the full range data set, but this can show the general PT equilibrium trend.)**

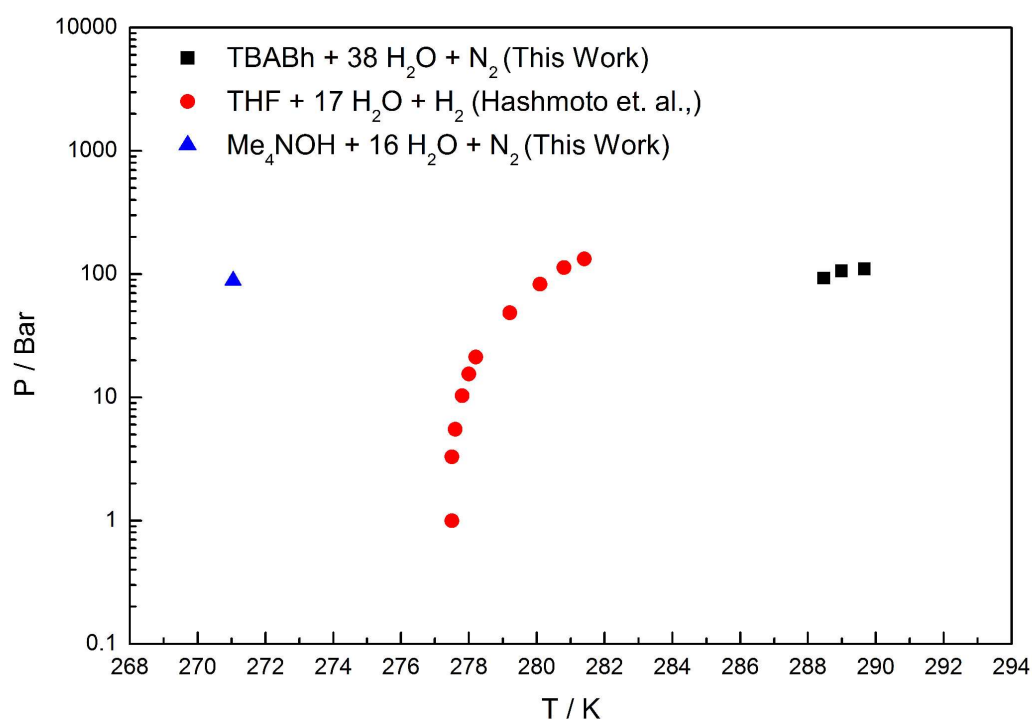



**Table S1.**

| NIGM type      | Dose of $\gamma$ -ray (kGy) | Released amount (ml/g) |
|----------------|-----------------------------|------------------------|
| N <sub>2</sub> | 0 (before the irradiation)  | 24.52 $\pm$ 0.24       |
|                | 30                          | 24.86 $\pm$ 0.81       |
| H <sub>2</sub> | 0 (before the irradiation)  | 19.47 $\pm$ 0.21       |
|                | 30                          | 19.27 $\pm$ 0.24       |
